# Supplementary material for: Identification of a Polyketide Synthase Gene Responsible for Ascochitine Biosynthesis in Ascochyta fabae and Its Abrogation in Sister Taxa
Source: PubMed Central journal article supplement (PMC6763771; doi:10.1128/msphere.00622-19), 2019-09-25

Alen\_A14\_G08272

CDS

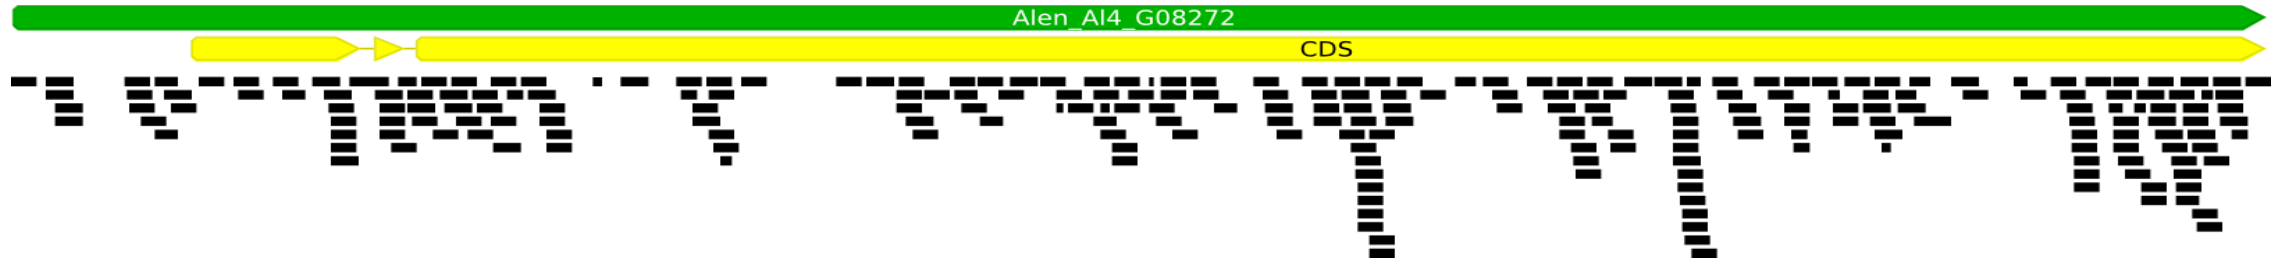

Supplement: mSphere.00622-19-sf001.pdf [file mSphere.00622-19-sf001.pdf]
